# Supplementary material for: Scalable perovskite coating via anti-solvent-free Lewis acid–base adduct engineering for efficient perovskite solar modules
Source: Royal Society of Chemistry journal article supplement (doi:10.1039/d0ta10366g), 2020-12-26
Supplement: d0ta10366g1.pdf [file d0ta10366g1.pdf]

Supporting Information

## Scalable Perovskite Coating via Anti-solvent-free Lewis Acid-Base Adduct Engineering for Efficient Perovskite Solar Module

Do-Kyoung Lee<sup>1</sup>, Kwang-Soo Lim<sup>1</sup>, Jin-Wook Lee<sup>2</sup> and Nam-Gyu Park<sup>1\*</sup>

<sup>1</sup>School of Chemical Engineering, Sungkyunkwan University, Suwon 16419, Korea

<sup>2</sup>Advanced Institute of Nanotechnology (SAINT) and Department of Nanoengineering, Sungkyunkwan University, Suwon 16419, Korea

\*Corresponding author: [npark@skku.edu](mailto:npark@skku.edu), Tel: (+82)31-290-7241

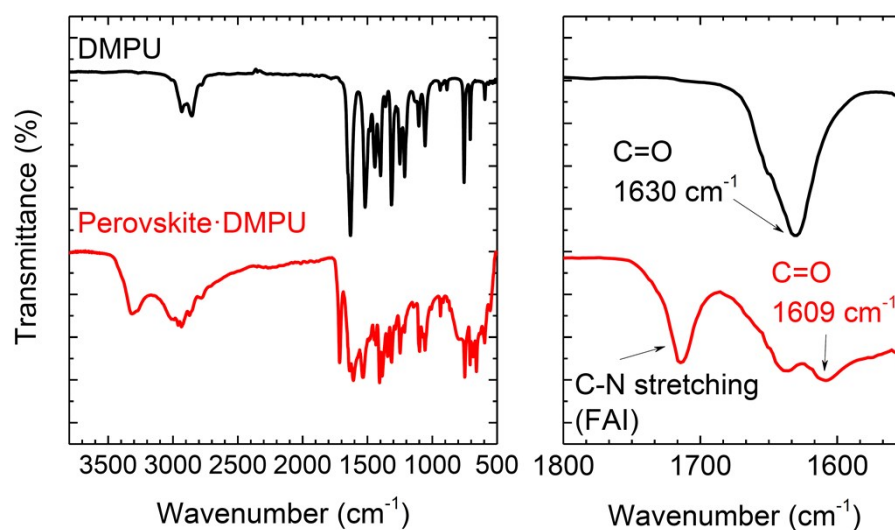

**Figure S1.** FT-IR spectra of the as-formed perovskite-DMPU powder (red line) and DMPU (black line) as reference. C-N stretching is related to FAI.

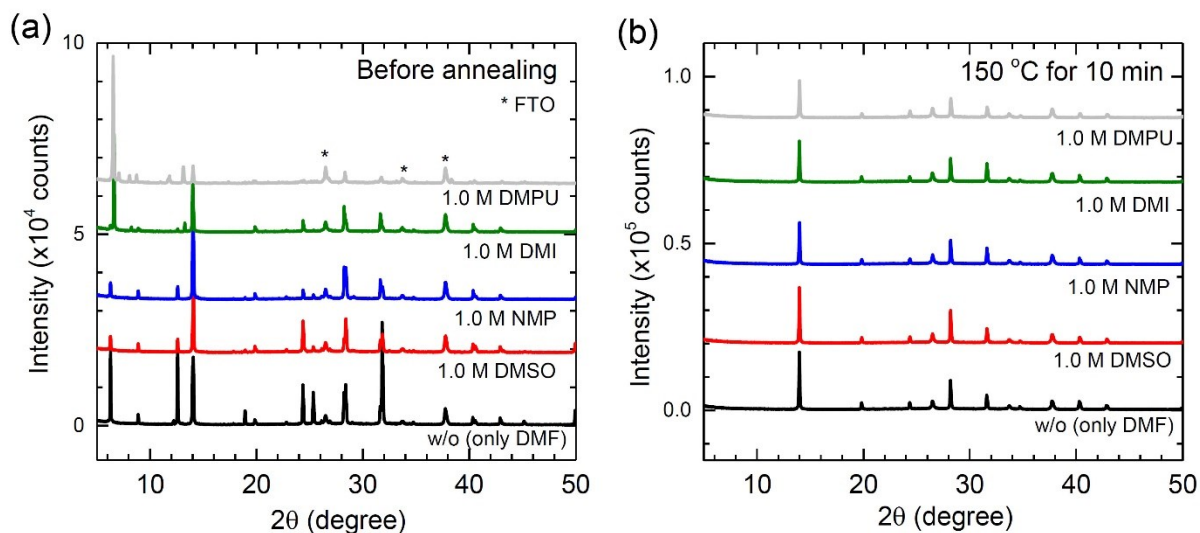

**Figure S2.** XRD patterns of (a) as-deposited and (b) 150 °C-annealed films formed from the air-knife-assisted D-bar coating using the Lewis base (DMSO, NMP, DMI or DMPU) contained precursor solution. Concentration of the Lewis base was 1.0 M. The perovskite composition was  $(\text{FAPbI}_3)_{0.95}(\text{CsPbBr}_3)_{0.05}$ . DMF was used as solvent for the precursor solution.

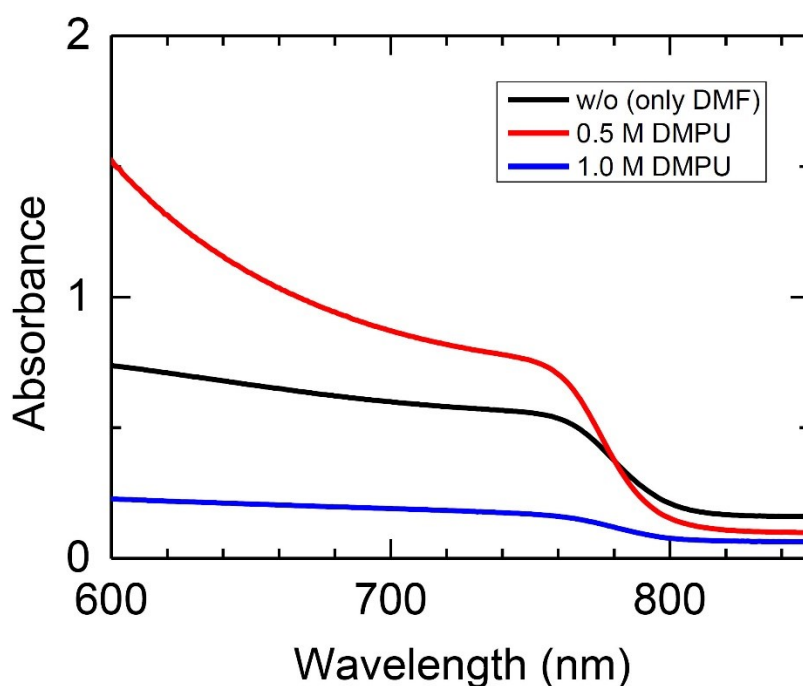

**Figure S3.** Optical absorption spectra of the 150 °C-annealed perovskite films formed from the DMPU-contained precursor solution with different DMPU concentration of 0.5 M and 1.0 M. DMF was used as a solvent for the precursor solution. Perovskite  $(\text{FAPbI}_3)_{0.95}(\text{CsPbBr}_3)_{0.05}$  films were coated on the  $\text{SnO}_2$ -coated FTO substrates by the air-knife-assisted D-bar coating.

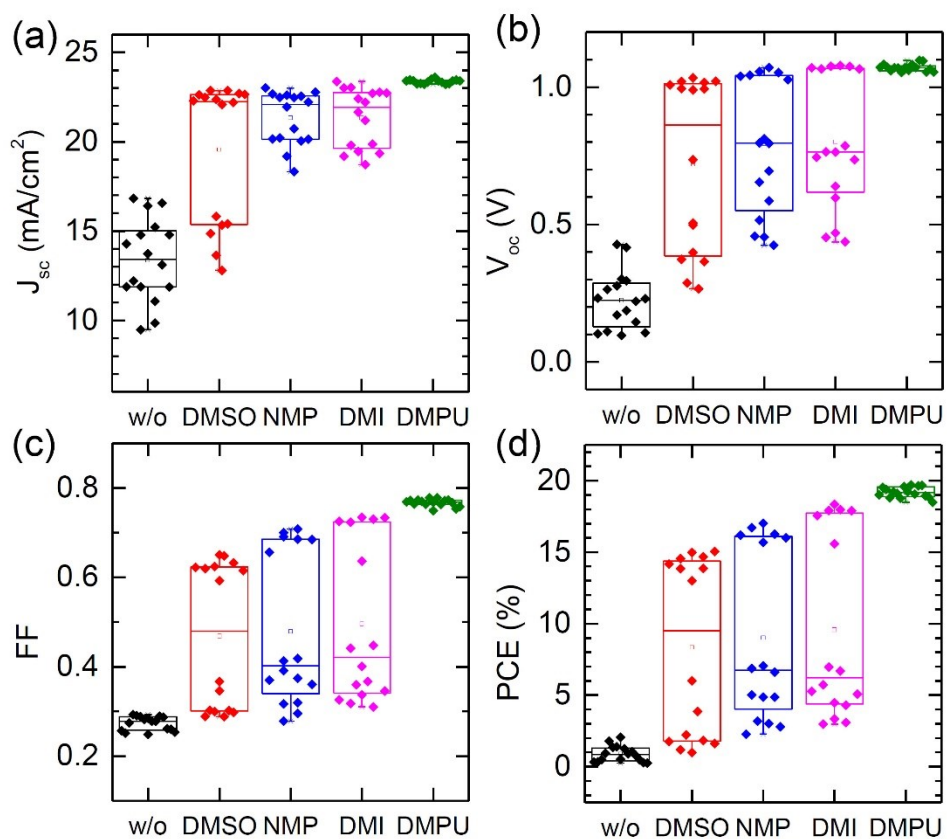

**Figure S4.** Statistical photovoltaic parameters of (a)  $J_{sc}$ , (b)  $V_{oc}$ , (c) FF and (d) PCE for PSCs employing the  $(FAPbI_3)_{0.95}(CsPbBr_3)_{0.05}$  perovskite films formed from the air-knife-assisted D-bar coating using the Lewis base (DMSO, NMP, DMI or DMPU) contained precursor solutions. The Lewis base concentration was 0.5 M. The reverse scanned data are presented.

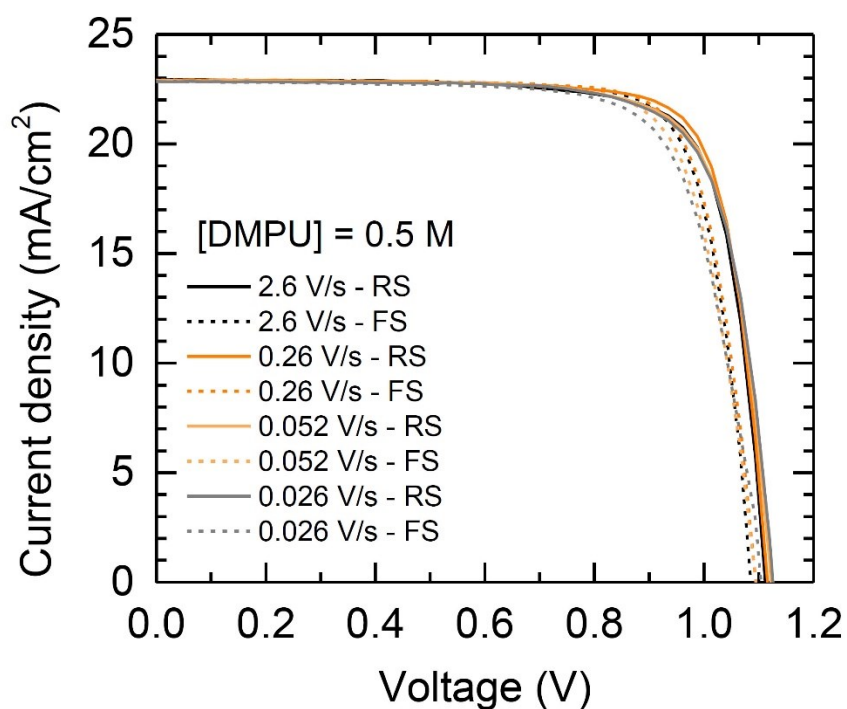

**Figure S5.** Scan-rate and direction dependent J-V curves of PSC employing a piece of the large-area perovskite film formed from the D-bar coating the 0.5 M DMPU-contained precursor solution. The device was measured under AM 1.5G 1 sun illumination with active area of 0.125 cm<sup>2</sup>. RS and FS stand for reverse scan and forward scan, respectively.

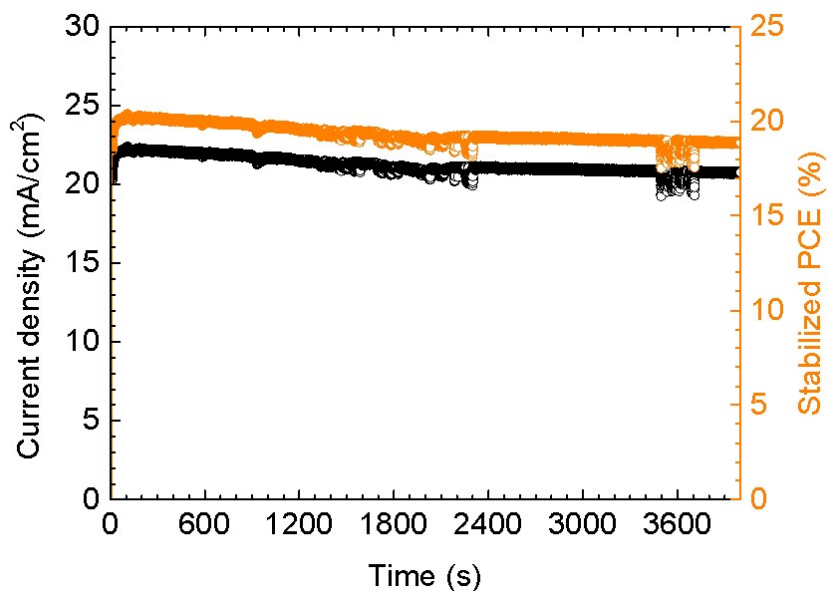

**Figure S6.** The steady-state PCE and current density at maximum power voltage for PSC (active area = 0.125 cm<sup>2</sup>) employing the (FAPbI<sub>3</sub>)<sub>0.95</sub>(CsPbBr<sub>3</sub>)<sub>0.05</sub> film formed from the 0.5 M DMPU-contained solution.

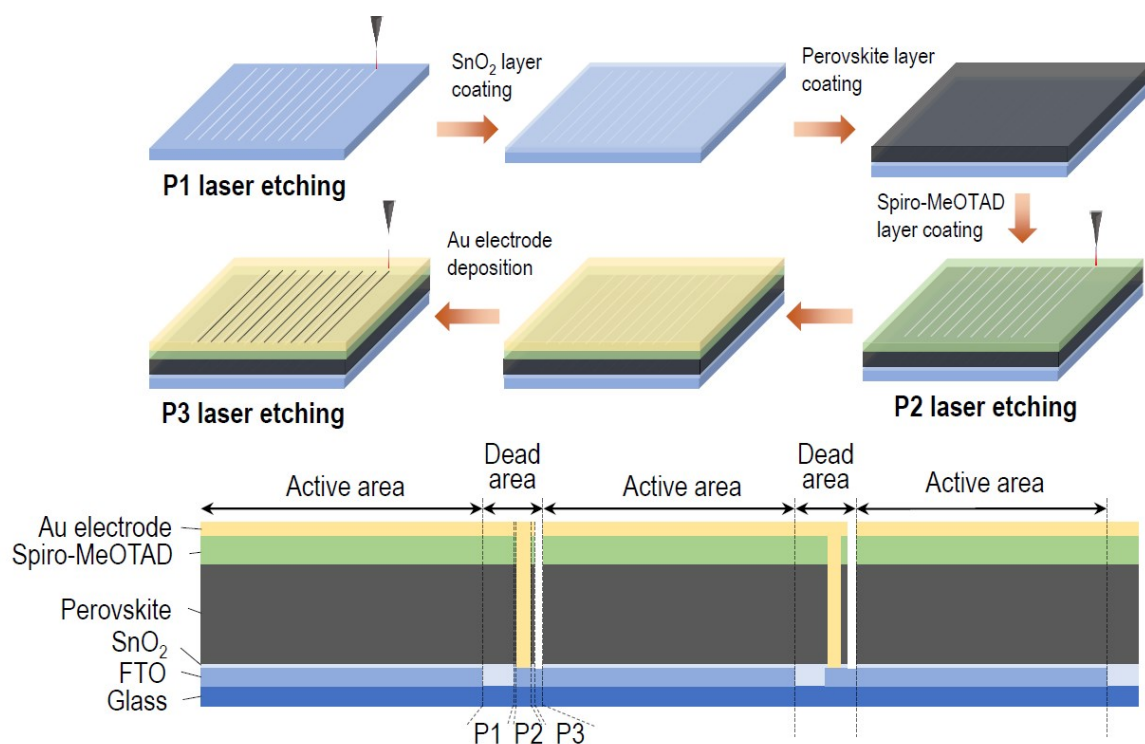

**Figure S7.** Schematic illustration of the fabrication process (top panel) and cross-sectional structure (bottom panel) for a perovskite solar module. P1, P2 and P3 etching was performed by a laser scribe.

**Table S1.** Amplitude ( $A_1$  and  $A_2$ ) and time constant ( $\tau_1$  and  $\tau_2$ ) obtained from fitting the TRPL data with a bi-exponential equation. Average lifetime ( $\tau_{ave}$ ) was calculated from  $(A_1\tau_1^2 + A_2\tau_2^2)/(A_1\tau_1 + A_2\tau_2)$ .

| [DMPU] | $A_1$<br>(%)      | $\tau_1$<br>(ns) | $A_2$<br>(%)      | $\tau_2$<br>(ns) | $\tau_{ave}$<br>(ns) |
|--------|-------------------|------------------|-------------------|------------------|----------------------|
| 0 M    | 35.60<br>(46.92%) | 213.42           | 40.27<br>(53.08%) | 2032.61          | 995.73               |
| 0.3 M  | 15.94<br>(21.12%) | 98.70            | 59.52<br>(78.88%) | 2737.74          | 2138.97              |
| 0.5 M  | 8.23<br>(11.13%)  | 49.91            | 65.74<br>(88.87%) | 4412.92          | 3916.35              |
| 0.8 M  | 26.58<br>(38.93%) | 137.96           | 41.70<br>(61.07%) | 2488.31          | 1469.46              |
| 1.0 M  | 41.99<br>(59.68%) | 52.37            | 28.37<br>(40.32%) | 1141.91          | 433.19               |

**Table S2.** Photovoltaic parameters of  $J_{sc}$ ,  $V_{oc}$ , FF and PCE for the PSCs depending on scan rate and scan direction (RS = reverse scan, FS = forward scan). Perovskite films were prepared by D-bar coating using a 0.5 M DMPU-contained solution.

| Scan rate – direction | $J_{sc}$ (mA/cm <sup>2</sup> ) | $V_{oc}$ (V) | FF    | PCE (%) |
|-----------------------|--------------------------------|--------------|-------|---------|
| 2.6 V/s – RS          | 22.93                          | 1.112        | 0.783 | 19.95   |
| 2.6 V/s – FS          | 22.95                          | 1.086        | 0.788 | 19.63   |
| 0.26 V/s – RS         | 22.91                          | 1.116        | 0.797 | 20.37   |
| 0.26 V/s – FS         | 22.92                          | 1.095        | 0.789 | 19.79   |
| 0.052 V/s – RS        | 22.90                          | 1.123        | 0.772 | 19.86   |
| 0.052 V/s – FS        | 22.88                          | 1.095        | 0.768 | 19.23   |
| 0.026 V/s – RS        | 22.85                          | 1.126        | 0.766 | 19.71   |
| 0.026 V/s – FS        | 22.84                          | 1.104        | 0.745 | 18.78   |
